**Title:** Taxonomic scale dependency of Bergmann's patterns: A cross-scale comparison of hawkmoths and birds along a tropical elevational gradient

**Running title:** Bergmann's patterns in hawkmoths and birds

**Authors:** Mansi Mungee<sup>1\*</sup>, Rohan Pandit<sup>2</sup>, Ramana Athreya<sup>3</sup>

<sup>1</sup>ORCID ID - 0000-0002-5452-7196

mansim@students.iiserpune.ac.in

Wildlife Institute of India

P.O.Box # 18, Chandrabani, Dehradun – 248001, Uttarakhand, INDIA

\*Corresponding Author

<sup>2</sup>rohanpandit87@gmail.com

B/3 Sterling Homes, Warje, Pune – 411058, Maharashtra

<sup>3</sup>ORCID ID - 0000-0001-7141-7311

rathreya@iiserpune.ac.in

Indian Institute of Science Education and Research

Homi Bhabha Road, Pashan, Pune – 411008, Maharashtra, INDIA.

1 **Title:** Taxonomic scale dependency of Bergmann's patterns: A cross-scale comparison of  
2 hawkmoths and birds along a tropical elevational gradient

### 3 **Abstract**

4 Bergmann's rule predicts a larger body size for endothermic organisms in colder environments. The  
5 multiplicity of patterns and processes is expected because body size and temperature are two most  
6 fundamental factors on which many physiological, ecological and evolutionary processes depend,  
7 affecting all levels of biological organization, from individuals to communities. The confounding  
8 results from previous studies may be due to the differences in taxonomic (intraspecific, interspecific  
9 and community) and spatial (latitudinal vs elevational) scales. We compared Bergmann's patterns  
10 for endotherms (Aves) and ectotherms (Lepidoptera: *Sphingidae*) along a same 2.6 km elevational  
11 transect in the eastern Himalayas. Using a large data spanning 3,302 hawkmoths (76 morpho-  
12 species) and 15,746 birds (245 species), we compared the patterns at the intraspecific (hawkmoths  
13 only), interspecific and community scales. At the interspecific scale, we account for phylogenetic  
14 non-independence in body mass by using a hierarchical linear mixed effects model for hawkmoths,  
15 and a phylogenetic generalised least squares model for birds. We assess the importance of using  
16 abundance-weighted metrics at the community scales, after accounting for spatial auto-correlation  
17 in communities. Hawkmoths exhibited positive Bergmann's pattern at the intraspecific and  
18 abundance-weighted community scale. Intraspecific variation accounted for a substantial 33%  
19 variation at the community level. Contrary to this, birds exhibited a strong converse-Bergmann's  
20 pattern at interspecific and community scales, both with- and without-abundance. Overall, all  
21 metrics which incorporate local traits and/or species abundances show stronger correlations than  
22 when this information is lacking. The multiplicity of patterns at a single location provides the  
23 opportunity to disentangle the relative contribution of individual- and species-level processes by  
24 integrating data across multiple nested taxonomic scales for the same taxa. We suggest that future

25 studies of Bergmann's patterns should explicitly address taxonomic- and spatial-scale dependency,  
26 with species relative abundance and intraspecific trait variation as essential ingredients especially at  
27 short elevational scales.

28 **Key words:** Bergmann's patterns, birds, community-level, elevational gradient, hawkmoths,  
29 interspecific, intraspecific, tropical

## 30 **Introduction**

31 Bergmann's rule is a popular, though contentious ecogeographical pattern which suggests a negative  
32 body size-temperature relationship in endothermic organisms. It is derived from a biophysical law  
33 which predicts better heat retention in larger-bodied animals due to their smaller surface area to  
34 volume ratio (Meiri & Dayan 2003). The direct and indirect influence of body size in many  
35 physiological, macroecological, and evolutionary processes (Bartholemew et al. 1981; Gillooly et  
36 al. 2005) and the simplicity of the initial explanation for this relationship are perhaps responsible for  
37 its popularity in ecological studies (Meiri & Dayan 2003; Watt et al. 2010; Olalla-Tárraga 2011).  
38 However, the results till date have been mixed, spanning positive, negative, and no correlation  
39 (Ashton 2002; Blackburn & Hawkins, 2004; Rodríguez et al. 2008; Olson et al. 2009; Shelomi  
40 2012; Gutiérrez-Pinto et al. 2014; Gohli & Voje 2016; Freeman 2017; Nwaogu et al. 2018; Riemer  
41 et al. 2018).

42 In ectotherms, a converse Bergmann's pattern has been proposed due to the shorter seasons  
43 associated with higher latitudes and elevations, which limits developmental time and hence body  
44 size (Atkinson & Sibly, 1997; Mousseau, 1997; Chown & Gaston, 2010). However, even here, a  
45 variety of results have led to the development of several taxon- and life history-specific mechanisms  
46 including heat conservation (Zamara-Camacho et al. 2014). Some of the commonly hypothesised  
47 mechanisms, in both ectotherms and endotherms, include the starvation resistance hypothesis  
48 (Cushman et al. 1993), growing season length (Bidau & Marti 2007), water availability (Ashton  
49 2002), converse water availability (Zug et al. 2001), primary productivity (Rosenzweig 1968),  
50 energy-water conservation (Olalla-Tárraga et al. 2009), and competition and prey-predator  
51 dynamics (McNab 1971).

52 The primary focus of research on the body size-temperature relationship has been to assess the  
53 relative importance of these different processes across taxa and regions. However establishing the  
54 generality of a process, even for the same organismal group, has been hindered by the differences in  
55 the taxonomic scale (intraspecific, interspecific or community) at which studies are conducted  
56 (Gaston et al. 2008, Olalla-Tárraga et al. 2010; Figure 1). Studies at the intraspecific scale, also  
57 known as the population-approach, have documented clines along a temperature gradient (Ashton  
58 2002; Yom-Tov & Geffen 2006; Fan et al. 2019) whereas interspecific studies have examined the  
59 pattern across multiple species using mean values for both body size and temperature (e.g. Freeman  
60 2017; Alhajeri & Stepan 2016; Beck et al. 2016). The less common community- or assemblage-  
61 approach uses mean body size across all co-occurring species observed within a pre-defined area  
62 such as an elevational belt or a latitudinal grid (e.g. Blackburn & Gaston 1996; Olalla-Tárraga et al.  
63 2006; Rodríguez et al. 2008; Zeuss et al. 2017; Brehm et al. 2019).

64 Studies of the intraspecific pattern usually focus on a single or few closely-related species which  
65 exhibit large environmental (temperature) ranges (Ashton 2002; Gutiérrez-Pinto et al., 2014;  
66 Freeman 2017). Thus, although critical for understanding species-specific responses, the  
67 intraspecific approach may not be ideal for addressing the generality of an ‘eco-geographical rule’  
68 since a majority of species do not span a sufficient range of temperature to exhibit marked  
69 intraspecific variation in body size (Gaston et al. 2008). The interspecific approach, on the other  
70 hand, uses information on multiple species, but constraints the data to species mean body size and  
71 mid-point of its elevational/latitudinal distribution. This ignores intraspecific variation, relative  
72 species abundances and range overlap between species - all three of which are shown to be strong  
73 determinants of macroecological patterns (Blackburn & Hawkins 2004).

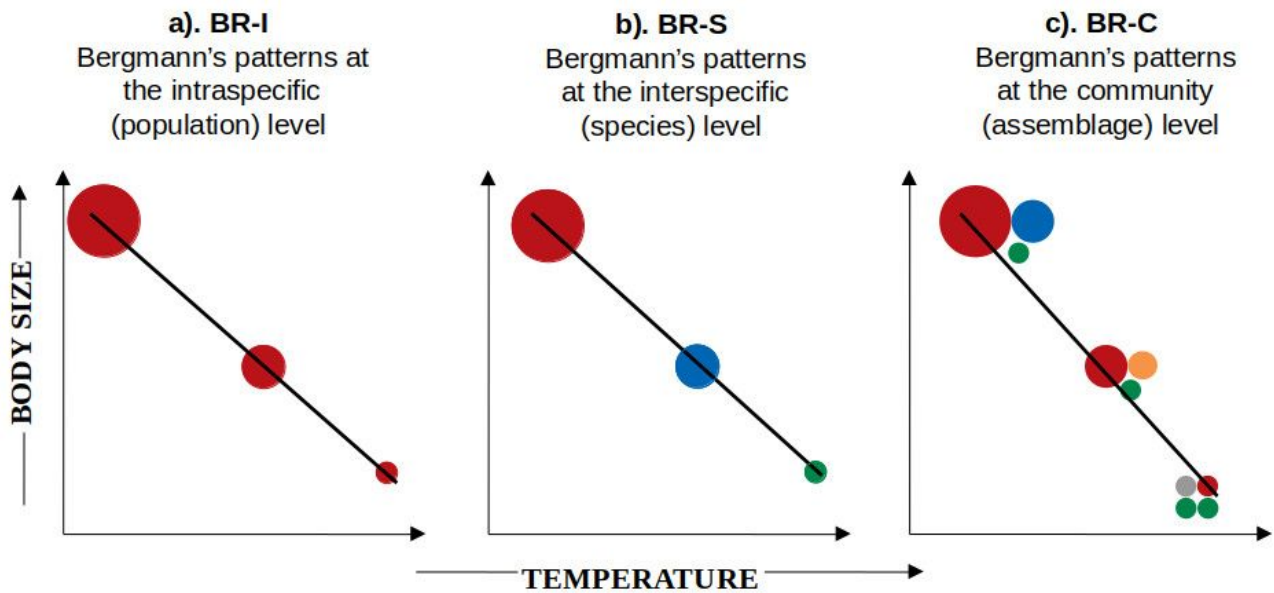

**Figure 1.** Three hypothetical scenarios are shown to illustrate a positive Bergmann's pattern at three taxonomic scales: intraspecific (BR-I), interspecific (BR-S) and community (BR-C). Each circle represents an individual, colors represent different species, and the size of the circle is proportional to the body size of the individual. **a). BR-I:** In the intraspecific approach, individuals of the same species are measured at different points along a temperature gradient, and individuals observed at higher temperatures exhibit lower body size; **b). BR-S:** In the interspecific approach, multiple species are recorded along a temperature gradient, and overall smaller species are observed at higher temperatures; **c). BR-C:** In the community approach, all individuals within a pre-defined grid (or latitudinal / elevational belt) are measured and community mean body size is lower at higher temperature. The BR-C pattern can occur due to i). *Intraspecific variation* (e.g. individuals of red species are becoming smaller with increasing temperature); ii). *Interspecific variation* (e.g. blue species is replaced by the smaller orange species, which is further replaced by the even smaller grey species), or due to iii). *Variation in species abundances* (e.g. the green species of constant body size is found across the breadth of the gradient, however its abundance is higher in the community at higher temperatures).

74 Several authors have highlighted the scale-dependency of Bergmann's patterns, and the community-  
75 approach is often remarked as the most appropriate way to investigate body size variation along  
76 broad temperature gradients as it can account for variations at both intra- and interspecific levels  
77 (Blackburn & Hawkins 2004, Meiri & Thomas 2007; Olalla- Tárrega et al., 2007). In the context of  
78 a Bergmann's pattern, a greater contribution of intraspecific variation or change in species  
79 abundances to the variation in community mean body size may be indicative of a stronger role of  
80 size-related competition in facilitating species coexistence within a community (MacArthur &

81 Levins 1967; Siefert et al. 2015). On the other hand, stronger interspecific variation, i.e. species  
82 turnover, is associated with strong environmental filtering on species' body-, and therefore range-  
83 size (Keddy 1992; de la Riva et al., 2015). More importantly, the variations at the intra- and  
84 interspecific scales may also occur in opposite directions, resulting in a mis-characterization of the  
85 pattern or the process when either information is lacking (Vellend et al. 2014). Indeed many studies  
86 in plant functional ecology have shown a congruence of patterns and processes across different taxa  
87 only when individual-level data were taken into consideration (Kichenin et al. 2013; Siefert et al.  
88 2015; Des Roches et al. 2018). Despite this, we found only two community level investigations of  
89 Bergmann's patterns which have incorporated both, intraspecific variation and species relative  
90 abundances – one on bees (Classen et al., 2017) and another on moths (Brehm et al., 2019).

91 Body size is arguably the most important animal trait, and therefore it is not surprising that its  
92 variation is determined by several different processes, usually in a case- and taxon-specific manner.  
93 However, more importantly, the observed “diversity of Bergmann's patterns” and the associated  
94 processes is also influenced by the different contexts of the many studies. They have differed not  
95 only in their taxonomic (intraspecific, interspecific or community) and spatial (latitudinal or  
96 elevational) scales, but also in the metrics used for the same scales (e.g. with and without species  
97 abundances/intraspecific variation for the community scale along elevational gradients; Beck et al.  
98 2016; Brehm et al. 2019). Here, we investigate whether reducing the number of confounding factors  
99 would make for greater uniformity of body size-temperature relationships than seen in previous  
100 cross-taxa and cross-scale comparisons. We compare body size variation of endotherms (Aves) and  
101 ectotherms (Lepidoptera: *Sphingidae*) along the same compact elevational transect spanning 200-  
102 2770 m in the eastern Himalayas. We hypothesize that if heat conservation is the primary  
103 determinant of variation in body size, then we should observe a positive Bergmann's pattern in  
104 both, hawkmoths and birds, and at all three taxonomic scales – intraspecific (only hawkmoths),

105 interspecific and community, i.e. body size should increase with elevation at all taxonomic scales  
106 and for both organismal groups. We further assess the importance of species relative abundances  
107 and/or intraspecific variation in determining community level variation in body mass for the two  
108 taxa.

109 Sphingidae, commonly known as hawkmoths, are relatively easy to identify to the species level, and  
110 comprise over 1600 species globally with the highest diversity in the tropics (Beck et al. 2006a;  
111 2006b, 2009; Kitching 2020). Birds are popular targets of studies of Bergmann's pattern due to their  
112 high and easily identifiable diversity, well documented geographical distributions (Orme et al. 2006;  
113 Quintero & Jetz 2018), morpho-trait measurements (Ali & Ripley 1972; Rasmussen & Anderton  
114 2005; Wilman et al. 2014), evolutionary relationships (Jetz et al. 2012), and perhaps their role in the  
115 original study (Salewski & Watt 2017).

## 116 **Materials and Methods**

### 117 *Study region and the data*

118 The study area and the hawkmoth data are described in Mungee & Athreya (2020a; 2020b). Briefly,  
119 hawkmoth individuals were sampled at 13 elevations separated by approximately 200 m between  
120 200 and 2770 m in Eaglenest Wildlife Sanctuary in the eastern Himalayas of Arunachal Pradesh,  
121 northeast India. The region is one of the world's 8 '*hottest hotspots*' of biodiversity and endemism  
122 (Myers et al., 2000) with a rich avifauna (Orme et al. 2005; Price 2012). A novel photogrammetric  
123 method was used for morphological measurements of individuals of (unfettered) hawkmoths which  
124 settled on a UV light screen (Mungee & Athreya 2020a).

125 We carried out transect counts of birds along the same elevational gradient, but with a higher  
126 elevational resolution of 50 m. Each elevational transect was sampled on 12x2=24 occasions during



127 0600-1200 hrs in April-June, 2012-2014. We minimised systematic differences in bird activity  
128 across the 6-hr sampling window by subdividing it into three periods of 2 hour each – early (0600-  
129 0800 hrs), mid (0800-1000 hrs) and late (1000-1200 hrs). The 12 replicates at each elevation were  
130 equally distributed across these 3 periods. We could not sample below 500 m inside Eaglenest due  
131 to accessibility issues. Therefore, we sampled the lowest elevation (i.e. 200 m) in the adjoining  
132 Pakke Tiger Reserve, about 20 km from the 500 m transect in Eaglenest. Species mean body mass  
133 were obtained from published resources (Ali & Ripley 1972; Rasmussen & Anderton 2005;  
134 Schumm et al. 2020). Due to a strong linear relationship between temperature and elevation across  
135 our steep study site ( $r^2 = 0.98$ ;  $p < 0.001$ ), we use elevation as the independent variable in all  
136 analyses (Munsee & Athreya 2020b).

## 137 **Statistical analyses**

### 138 ***Intraspecific Bergmann's pattern (BR-I)***

139 We investigated the intraspecific pattern only for hawkmoths since we did not measure traits of  
140 individual birds. We estimated the pattern for hawkmoths as a group by using normalised body  
141 mass and elevation with species mean values:

$$142 \quad B_{ij}^{norm} = \frac{B_{ij} - \mu_{Bj}}{\mu_{Bj}} \quad \text{and} \quad E_{ij}^{norm} = E_{ij} - \mu_{Ej} \quad ,$$

143 where B is body mass, E is elevation,  $\mu$  is the species mean, and the indices indicate the *i*-th  
144 individual of the *j*-th species. With this normalisation we were able to pool the data from all  
145 individuals regardless of species and elevation to derive the intraspecific relationship between body  
146 mass and elevation for the 'community' as a whole. We also examined the intraspecific pattern for  
147 individual species which had more than 20 individuals and spanned more than 800 m (sampled at 4  
148 or more elevations) in elevational range.

### 149 ***Interspecific Bergmann's pattern (BR-S)***

150 For the interspecific analysis, the species' mean body mass (mean across all individuals from all  
151 elevations for hawkmoths; published mean values for bird species) was determined as a function of  
152 the midpoint of the elevational range for the species using ordinary least squares regression.  
153 Following previous practice we used  $\log_{10}(\text{body mass})$  as the dependent variable at this level.  
154 However, body mass may be phylogenetically conserved across species leading to non-  
155 independence of residuals in a linear regression. To account for this, we used different approaches  
156 for hawkmoths and birds depending on the availability of information on phylogenetic relatedness  
157 among species.

158 In case of hawkmoths, we used the phylogenetically informed taxonomic classification assembled  
159 by Beerli et al. (2019) to perform a stepwise hierarchical linear mixed effect model with subfamily,  
160 tribe and genus as random effects and elevation as the fixed effect. Response (body mass) and  
161 explanatory (elevation) variables were standardized to zero mean and unit variance to make the  
162 coefficient estimates comparable within and between the hierarchical models. In case of birds, we  
163 used the phylogenetic tree provided by Schumm et al. (2020) for birds of eastern Himalayas. We  
164 added 13 missing species to this tree using the latest global avian phylogeny (Jetz et al. 2012). To  
165 do this, we scaled their branches to convert them into ultrametric trees, and used the relative branch  
166 lengths and placement from the global phylogenetic tree. We ran a phylogenetic generalized least  
167 square (PGLS) regression and estimated the phylogenetic signal of body mass by maximum-  
168 likelihood estimated values of Pagel's lambda (Pagel, 1999).

### 169 ***Community-scale Bergmann's pattern (BR-C)***

170 For the community approach (BR-C), we calculated three metrics to assess the importance of  
171 species abundances and/or intraspecific variation in characterizing the community-level variation in  
172 body mass of hawkmoths and birds:

- 173 i. *CM-S (Community mean using species data)*: Mean body mass across all co-occurring  
174 species at an elevation without considering their relative abundance. For hawkmoths, a  
175 single ‘regional’ mean (across all individuals from all elevations) body mass value was used  
176 for each species; this is the usual method while assessing grid-level assemblage patterns  
177 across latitudinal gradients (Olalla-Tárraga et al., 2010); it depends only on turnover in  
178 species richness *i.e.*, species occurrences.
- 179 ii. *CM-A (Species Community mean with species abundance)*: Mean of species mean trait  
180 value, weighted by elevation-specific abundance. This has been usually termed Community  
181 Weighted Mean (CWM) in previous studies (Cornwell & Ackerly 2009) but we suggest that  
182 the terminology used here brings out the differences in the three metrics in an easier manner;  
183 this metric encapsulates turnover in species diversity *i.e.*, both species richness and  
184 abundance.
- 185 iii. *CM-I (Community mean using individual data; only hawkmoths)*: Mean of all co-occurring  
186 individuals at an elevation, regardless of their species; it includes turnover in richness and  
187 abundance, and intraspecific variation.

188 We calculated the linear regression of the BR-C metrics with elevation, with and without weighting  
189 the communities using species richness (following Meiri & Thomas 2007). Additionally, for the  
190 metric CM-A, we also compare the patterns using community-weighted median, instead of mean.  
191 For all community level plots, we evaluated spatial autocorrelation in mean body mass by using  
192 Akaike Information Criterion (AIC) and the Likelihood Ratio (LR) tests of residuals (Diniz-Filho et  
193 al. 2003).

194 For hawkmoths, we also assessed the relative contributions of intra- and interspecific variability  
195 effects on community mean body mass along the elevational gradient following the variance

196 decomposition method proposed by Lepš et al. (2011). This method is based on the decomposition  
197 of the total sum of squares ( $SS_{\text{specific}}$ ) of the community-level trait variance along an environmental  
198 gradient (elevation) into three additive components: ‘fixed’ ( $SS_{\text{fixed}}$ ), ‘intraspecific’ ( $SS_{\text{intraspecific}}$ ) and  
199 ‘covariation’ ( $SS_{\text{cov}}$ ) effects:

$$200 \quad SS_{\text{specific}} = SS_{\text{fixed}} + SS_{\text{intraspecific}} + SS_{\text{cov}}$$

201 The two community-mean metrics used for this decomposition i.e. ‘fixed’ and ‘specific’ averages  
202 correspond to our CM-A and CM-I metrics. The ‘specific’ community-average body mass is  
203 calculated using the ‘local’ species body mass i.e. mean across individuals measured at that  
204 elevation (thus includes both inter- and intraspecific effects), and ‘fixed’ community-average body  
205 mass uses ‘regional’ species body mass i.e. mean across all individuals from all elevations along the  
206 gradient (includes only the interspecific effects). The effect of ‘intraspecific’ community mean is  
207 then calculated as the difference between ‘specific’ and ‘fixed’ averages. Linear regressions of the  
208 ‘specific’, ‘fixed’ and ‘intraspecific’ community averages are assessed, with elevation as an  
209 explanatory variable. The sums of squares for each of the three community-average measures  
210 explained by elevation is then used to assess the relative contributions of the intra- and interspecific  
211 components (Lepš et al., 2011).  $SS_{\text{cov}}$  component reflects the effect of covariation between inter-  
212 and intraspecific trait variability. We used 999 bootstraps to assess the significance of the three  
213 components.

214 All statistical analyses were performed in R 3.6.3 (R Core Development Team 2013) and the  
215 following packages were used: *spdep* 1.1.3 (Bivand et al. 2018), *vegan* 2.5.6 (Oksanen et al. 2019),  
216 *cati* 0.99.3 (Taudiere & Violle 2015), *ape* 5.3 (Paradis & Schlip 2018), *lmerTest* 3.1.3 (Kuznetsova  
217 et al. 2017), *caret* 6.0.86 (Kuhn 2020).

## 218 **Results**

219 We recorded a total of 4,731 hawkmoth individuals spanning 80 morphospecies, 30 genera and 3  
220 subfamilies (Figure S1; Table S1). We measured traits for 3,302 individuals from 76 species; the  
221 remaining either did not sit on the gridded screen or could not be measured due to poor image  
222 quality. We have presented the patterns at all taxonomic scales using only the “trait” sample of  
223 3,302 individuals, since we wished to compare results across taxonomic levels with the same data.  
224 Adding the rest of the sample, i.e. abundance-weights for the CM-A metric in the community  
225 approach, from the 4,731 individuals data did not change the results in any significant manner  
226 (Supporting Information Figure S2). We recorded 15,746 individual birds from 245 species, 150  
227 genera and 50 families (Table S1).

### 228 **BR-I**

229 At the pooled intraspecific level, hawkmoth body mass showed a weak, but significant positive  
230 correlation with elevation (Table 1; Figure 2a;  $r^2 = 0.001$ ,  $p < 0.05$ ). The intraspecific patterns of  
231 the 24 species in our data which had an elevational range of 800 m or more and had more than 20  
232 individuals were idiosyncratic (Table S2; Figure S1). Of them, the patterns of 17 (71%) species  
233 were not statistically significant, and only 6 (25%) species (*Acosmeryx naga*, *Acosmeryx omissa*,  
234 *Cechetra lineosa*, *Callambulyx rubricosa*, *Eupanacra sinuata* and *Rhagastis lunata*) exhibited weak  
235 but positive correlations, and one species a negative correlation (*Theretra clotho*) (Table S2; Figure  
236 S1).

### 237 **BR-S**

238 We found no support for an interspecific Bergmann’s pattern in hawkmoths using ordinary least  
239 squares regression (Table 1; Figure 2b;  $r^2 = -0.01$ ,  $p = 0.6$ ). Across the three hierarchical models,  
240 the explained variance (*pseudo-r*<sup>2</sup>) was consistently high (>0.5) and increased with each nested

**Table 1.** Linear regression between body size variation and elevation for hawkmoths and birds, at different taxonomic levels. All slopes significant at  $p < 0.1$  are in bold.

| <b>HAWKMOTHS</b>       |                                                                 |                                                   |                      |
|------------------------|-----------------------------------------------------------------|---------------------------------------------------|----------------------|
| <b>Taxonomic level</b> | <b>Model</b>                                                    | <b>Slope ± SE</b>                                 | <b>R<sup>2</sup></b> |
| <b>Intraspecific</b>   | Normalised(BM) ~ Normalised(Elevation); OLS                     | <b>(1.525 ± 0.742) x 10<sup>-5</sup></b>          | <b>0.001**</b>       |
| <b>Interspecific</b>   | log <sub>10</sub> (BM) ~ Elevation; OLS                         | (2.714 ± 5.179) x 10 <sup>-5</sup>                | -0.01                |
|                        | Standardised(BM) ~ Standardised(Elevation) + (1 Subfamily); LME | Pseudo-r <sup>2</sup> (Explained Deviance) = 0.57 |                      |
|                        | Standardised(BM) ~ Standardised(Elevation) + (1 Tribe); LME     | Pseudo-r <sup>2</sup> (Explained Deviance) = 0.67 |                      |
|                        | Standardised(BM) ~ Standardised(Elevation) + (1 Genus); LME     | Pseudo-r <sup>2</sup> (Explained Deviance) = 0.80 |                      |
| <b>Community</b>       | CM-S ~ Elevation; OLS                                           | <b>(-1.148 ± 0.578) x 10<sup>-4</sup></b>         | <b>0.20*</b>         |
|                        | CM-A ~ Elevation; OLS                                           | <b>(1.069 ± 0.408) x 10<sup>-4</sup></b>          | <b>0.33**</b>        |
|                        | CM-I ~ Elevation; OLS                                           | <b>(1.373 ± 0.573) x 10<sup>-4</sup></b>          | <b>0.28**</b>        |
|                        | Community median BM ~ Elevation; OLS                            | <b>(1.901 ± 0.564) x 10<sup>-4</sup></b>          | <b>0.46**</b>        |
|                        | CM-A ~ Elevation; SAR                                           | <b>(1.254 ± 0.385) x 10<sup>-4</sup></b>          | <b>0.43**</b>        |
| <b>BIRDS</b>           |                                                                 |                                                   |                      |
| <b>Taxonomic level</b> | <b>Regression Variables</b>                                     | <b>Slope ± SE</b>                                 | <b>R<sup>2</sup></b> |
| <b>Interspecific</b>   | log <sub>10</sub> (BM) ~ Elevation; OLS                         | <b>(-1.98 ± 0.478) x 10<sup>-4</sup></b>          | <b>0.06***</b>       |
|                        | log <sub>10</sub> (BM) ~ Elevation; PGLS                        | <b>(-3.830 ± 0.522) x 10<sup>-4</sup></b>         | -                    |
| <b>Community</b>       | CM-A ~ Elevation; OLS                                           | <b>(-3.806 ± 0.525) x 10<sup>-2</sup></b>         | <b>0.81***</b>       |
|                        | CM-S ~ Elevation; OLS                                           | <b>(-2.489 ± 0.379) x 10<sup>-2</sup></b>         | <b>0.78***</b>       |
|                        | Community median BM ~ Elevation; OLS                            | <b>(1.149 ± 0.190) x 10<sup>-2</sup></b>          | <b>0.75**</b>        |
|                        | CM-A ~ Elevation; SAR                                           | <b>(-3.428 ± 0.605) x 10<sup>-2</sup></b>         | <b>0.84***</b>       |

BM: Body mass; OLS = Ordinary Least Squares Regression; LME = (Hierarchical) Linear Mixed Effects Model with random intercept; SAR = Spatial Autoregressive model (Nagelkerke Pseudo R<sup>2</sup> values are reported for SAR models); CM-S: Community mean body mass across all co-occurring species without considering their local abundance; CM-A: Community mean body mass across all co-occurring species, weighted by local abundance; CM-I: Community mean body mass of all co-occurring individuals, regardless of species; \*  $p < 0.1$ ; \*\*  $p < 0.05$ ; \*\*\*  $p < 0.01$

241 level (*subfamily* = 0.57; *tribe* = 0.67; and *genus* = 0.80). Overall, integration of the phylogenetic  
 242 information did not affect the significance of the BR-S pattern ( $p = 0.12 - 0.67$ ). Contrary to  
 243 hawkmoths, we found a significant converse-Bergmann's pattern for birds at the interspecific level  
 244 (Table1; Figure 3a;  $r^2 = 0.06$ ,  $p < 0.01$ ). Phylogenetic generalised least square (PGLS) models gave  
 245 similar results (Table1;  $\lambda = 0.88$ ; 95% confidence interval = [0.85, 0.90]), hence we discuss only  
 246 OLS results below.

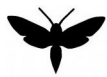

## Bergmann's patterns in hawkmoths at three taxonomic scales

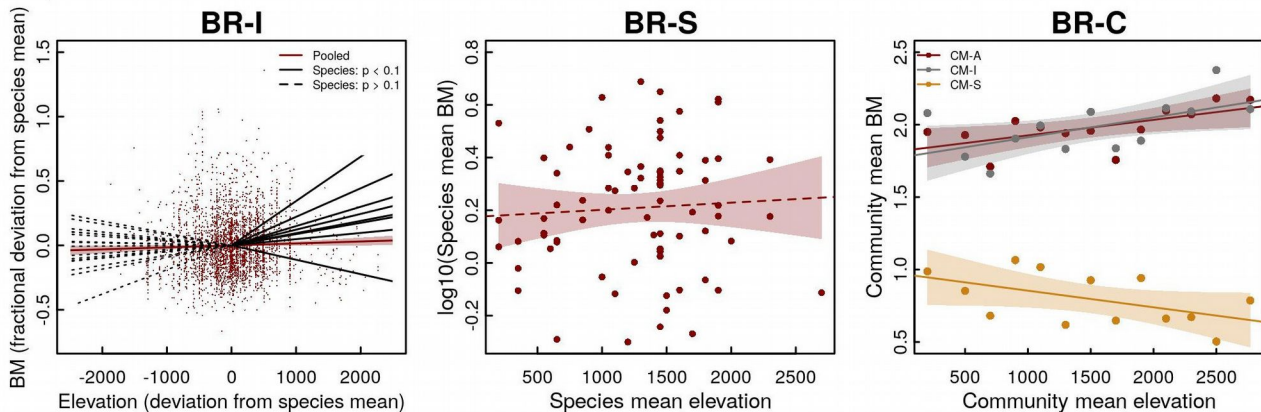

**Figure 2.** Relationship between elevation and body mass (BM) for hawkmoths at different taxonomic scales. **a) BR-I:** average intraspecific pattern obtained by pooling data of all individuals from all species. The red line represents the regression fit for the pooled data, while the black lines represent the 24 individual species which were sufficiently numerous (also see Figure S1); **b) BR-S:** interspecific pattern using species mean body size and midpoint of the elevational range; **c) BR-C:** **(i) CM-S (Community mean using species data):** Mean body mass across all co-occurring species at an elevation without considering their relative abundance (orange), **(ii) CM-A (Species Community mean with species abundance):** Mean of species mean trait value, weighted by elevation-specific abundance (red); **(iii) CM-I (Community mean using individual data):** Mean of all co-occurring individuals at an elevation, regardless of their species (grey). Regression coefficients for all the linear fits are listed in Table 1. All fits significant at  $p < 0.1$  are shown as solid lines, the rest are as dashed lines.

### 247 **BR-C**

248 We found a significant positive Bergmann's pattern in hawkmoths at the community level for the  
 249 abundance-weighted metric without incorporating intraspecific variation i.e. CM-A (Table 1; Figure  
 250 2c;  $r^2 = 0.33$ ;  $p < 0.05$ ) and for the abundance-weighted metric which incorporates intraspecific  
 251 variation i.e. CM-I ( $r^2 = 0.28$ ;  $p < 0.05$ ). However, surprisingly, we found a significant negative  
 252 pattern using the metric CM-S which does not incorporate 'local' abundance or intraspecific  
 253 variation (Table 1; Figure 2c;  $r^2 = 0.20$ ;  $p < 0.1$ ). Similar to the interspecific analysis, community  
 254 mean body mass exhibited a significant converse-Bergmann's patterns in birds (Figure 3b). Unlike  
 255 in hawkmoths, the pattern was consistent between CM-A ( $r^2 = 0.81$ ;  $p < 0.01$ ) and CM-S ( $r^2 =$

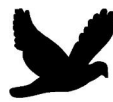

### Bergmann's patterns in birds at two taxonomic scales

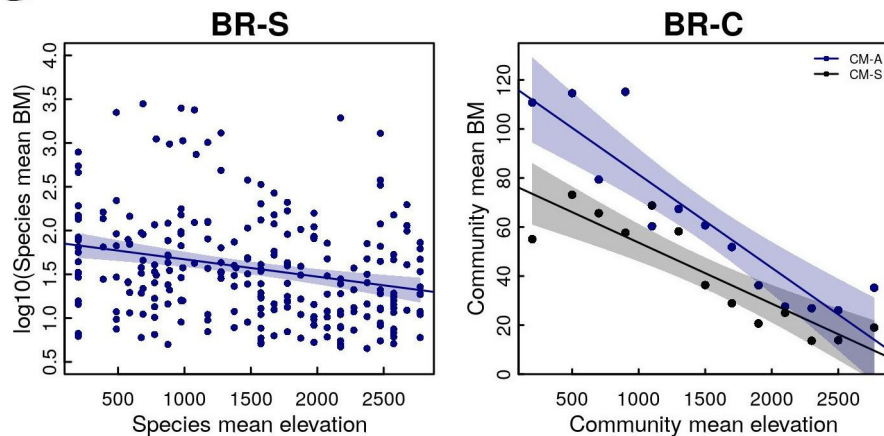

**Figure 3.** Relationship between elevation and body mass (BM) for birds at two taxonomic scales. **a) BR-S:** interspecific pattern using species mean body size and midpoint of elevational range; **b) BR-C:** (i) *CM-S (Community mean using species data)*: Mean body mass across all co-occurring species at an elevation without considering their relative abundance, (ii) *CM-A (Species Community mean with species abundance)*: Mean of species mean trait value, weighted by elevation-specific abundance; regression coefficients for all the linear fits are listed in Table 1. The regression lines were all significant at  $p < 0.1$ .

256  $0.78$ ;  $p < 0.01$ ). Weighting the communities by species richness (Table S3), or using median instead  
257 of mean (Table 1) did not significantly affect the parameter estimates, for both hawkmoths and  
258 birds. Variance partitioning of hawkmoth community mean body mass showed that interspecific  
259 variation (STV) and intraspecific variation (ITV) contributed  $54.2 \pm 8.1\%$  and  $33.0 \pm 5.5\%$   
260 respectively, with an overall  $12.8 \pm 8.4\%$  positive co-variation between the two (Figure 4).

## 261 Discussion

262 We have shown that hawkmoths and birds exhibit contrasting body size-elevation relationships at  
263 the abundance-weighted community level along the same 2600 m elevational transect in the east  
264 Himalayas. Interestingly, endothermic birds exhibited a strong converse-Bergmann's pattern while  
265 ectothermic hawkmoths showed a positive Bergmann's pattern. Statistically, the patterns varied  
266 across different taxonomic scales within each group, although qualitatively they were similar only



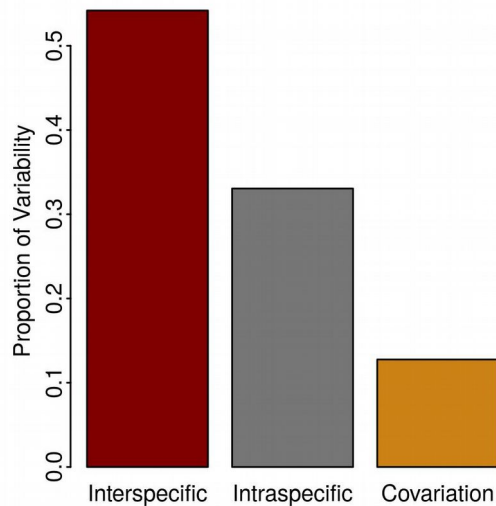

| Interspecific (Species turnover) | Intraspecific | Covariation  |
|----------------------------------|---------------|--------------|
| 0.54 ± 0.081                     | 0.33 ± 0.055  | 0.13 ± 0.084 |

**Figure 4.** For hawkmoths, the relative contribution of intraspecific trait variation, species turnover (richness + abundance), and their covariation was assessed using the variance partitioning approach proposed by Léps et al. 2011.

267 in case of birds. Hawkmoths exhibited significant Bergmann's patterns at the intraspecific (BR-I)  
268 and the community scales (CM-I and CM-A), but not when the metric did not include local trait or  
269 abundance (i.e. interspecific approach; BR-S). Interestingly, the community scale pattern which did  
270 not include local species abundances (i.e. CM-S) was contrary to that of abundance-based metrics,  
271 i.e. community species mean decreased with elevation. Some of the more abundant hawkmoth  
272 species for which we could test the intraspecific pattern individually showed a variety of patterns  
273 including positive, negative and no correlation. On the other hand, we detected the converse-  
274 Bergmann's pattern in birds at all investigated taxonomic scales (i.e. BR-S, BR-CM-S & BR-CM-  
275 A). However, statistically it was strongest for the abundance-weighted community mean and the  
276 least for the interspecific approach. In the absence of traits of individual birds we could not test for  
277 the metrics which required individual trait measurements. Clearly, thermoregulation is not the only  
278 or even the primary mechanism influencing the body size-temperature relationship, even in  
279 endotherms. More importantly, overall, all metrics which incorporate local traits and/or abundance  
280 show stronger correlations of body mass with elevation, than when this information is lacking.

281 The variety in the observed patterns of the body size-temperature relationship has largely been  
282 attributed to life-history related traits of different taxa (*e.g.* endotherms vs ectotherms; mesotherms  
283 vs exotherms). However, our study provides evidence for differing patterns for the same taxon,  
284 across different taxonomic scales (intraspecific, interspecific or community), and with different  
285 metrics (*e.g.* with or without abundance; with or without individual trait measurements), even when  
286 using the same data set. Clearly, the scale and the metric with which Bergmann's pattern is tested  
287 influences the conclusion of a study; *i.e.* each combination of metric and scale, presumably  
288 reflecting a different process, has its own body size-temperature pattern. Therefore, it may be best  
289 to treat 'Bergmann's Rule' simply as a label for a pattern associated with the negative relationship  
290 between body size and temperature; identifying the underlying process necessarily requires an  
291 understanding of the metric and the scale involved, as also an appreciation of how the pattern  
292 changes with these two, even for the same data.

293 Along with taxonomic scales, another important consideration when comparing body size variation  
294 across studies is the difference in the spatial scales (Levins 1992; Chase & Knight 2013; Chase et  
295 al. 2018). Most studies of Bergmann's pattern have been conducted across continental scales (*i.e.*,  
296 latitudinal gradients; Olalla-Tárraga et al. 2006; Rodríguez et al. 2008; Ollala-Tarraga et al. 2010;  
297 Zeuss et al. 2017). It has been suggested that the dominance of species turnover obviates the need to  
298 incorporate intraspecific or abundance variation at latitudinal scales, whereas intra-community  
299 dynamics, such as competition, play a stronger role in facilitating co-existence for shorter  
300 elevational transects where the environment changes substantially within a small geographic scale  
301 (Siefert et al. 2015). However, a large number of intraspecific analyses of Bergmann's patterns have  
302 shown that many species can exhibit substantial phenotypic or genetic variation in body mass even  
303 across continental scales (Ashton 2002; Adams & Church 2007; Hassall 2015; Goldberg et al.  
304 2018). To our best knowledge, no study has yet assessed the role of intraspecific/abundance

305 variation in determining community-level Bergmann's patterns across broad latitudinal gradients,  
306 although examples exist in the plant functional ecology literature (Siefert et al. 2015).

307 In our study, which spans a geographically compact transect, metrics which used abundance show  
308 higher significance of correlation, more so for hawkmoths than for birds. The difference in role of  
309 species abundance between hawkmoths and birds may be related to their beta diversities: 0.68 for  
310 hawkmoths and 0.93 for birds (Sørensen Indices; Supporting Information Figure S3), suggesting the  
311 presence of species with broader ranges in the former. Intraspecific variation and change in  
312 abundance may play a greater role in the change in community mean trait in taxa containing species  
313 with large geographical ranges. This also corroborates the lack of any significant correlation in the  
314 BR-S and BR-CM-S approach for hawkmoths, both of which lacked species relative abundances.  
315 On the other hand, turnover in species occurrences dominated the community-mean variation in  
316 birds and hence the negative body mass-elevation correlation was detected with and without  
317 abundance in both BR-S and BR-C.

318 Further, while latitudinal and elevational transects are most often viewed as similar through the  
319 prism of temperature, they differ in several important, but rarely considered, determinants of animal  
320 body size like oxygen availability (Körner 2007), air density (Dillon et al. 2006), UV-radiation  
321 (Mani 1968), etc. which may have contrasting influence on organismal body size through multiple  
322 pathways (Klepsatel et al. 2014). For instance, temperature seasonality is more prominent at high  
323 latitudes than at high elevations in the tropics (Rahbeck 1997; Körner 2000). Contrasting patterns of  
324 body size variation between latitudinal and elevational gradients has been reported for both  
325 endotherms and ectotherms (Gutiérrez-Pinto et al. 2014; Klepsatel et al. 2014; Sun et al. 2017) and  
326 therefore, coherence between latitudinal and elevational Bergmann's patterns is not always to be  
327 expected.

## 328 **Bergmann's patterns in hawkmoths**

329 At the intraspecific scale, the co-added data from individuals of all hawkmoth species exhibited a  
330 weak but statistically significant positive Bergmann's pattern. It should be noted that this is the  
331 average intraspecific value for the entire community. Of the 24 species tested separately, 6 (25%)  
332 exhibited a significant Bergmann's pattern while 1 species exhibited a converse Bergmann's pattern.  
333 Two of these (*Cechetra lineosa* and *Acosmeryx naga*), represent the most abundant species in the  
334 region (> 25% in our data set) and span almost the entire sampled elevational extent. It has been  
335 previously remarked that intraspecific clines in body size are generally expected only for the  
336 'common' species with large geographic ranges (*sensu* Chown & Gaston 2010). One reason for this  
337 may be the lack of statistical power for the smaller samples of the less abundant species for a given  
338 effort. Another reason for this may come from the generally smaller geographical, and hence  
339 environmental ranges associated with rare species. Therefore the intrinsic dispersion in the trait  
340 values within such a species would be a larger fraction of the width in environmental optimum  
341 across the geographical range. Whether the intraspecific Bergmann's clines in species of hawkmoths  
342 of our study region are due to genetic adaptation or phenotypic plasticity remains to be investigated.

343 At the species level, we did not find any significant correlation between body mass and elevation,  
344 which is in agreement with the three previous studies of the interspecific Bergmann's pattern in  
345 moths: of hawkmoths across latitude (Beerli et al. 2019), of Geometridae across elevation (Brehm  
346 & Fiedler 2004), and of macrolepidoptera in general across elevation (Beck et al. 2016). Beerli et al.  
347 (2019) reported a support for the resource availability hypothesis for hawkmoths at a latitudinal  
348 scale which links adult body size to resource availability during the developmental phase  
349 (Rosenzweig 1968). Our results do not support this, since productivity was strongly negatively  
350 correlated with elevation along our study transect (NDVI ~ elevation:  $r^2 = 0.84$ ;  $p < 0.01$ ).

351 No previous work has assessed community level variation in body size for the hawkmoth family.  
352 Brehm & Fiedler (2004) found no significant trend for the family *Geometridae* at the community  
353 level, although their smaller sampled elevational range (1000-2700 m) may have made the detection  
354 more difficult. On the other hand, Zeuss et al. (2017) found a converse-Bergmann's pattern for  
355 lepidopteran assemblages at a continental scale. They showed that voltinism, or the number of  
356 generations per year, may limit adult body size in macrolepidoptera by affecting the time available  
357 for development during the larval stage, although with species-specific exceptions. We note that the  
358 non-abundance weighted community-mean metric yielded a converse-Bergmann's pattern in our  
359 study also, though we are not in a position to test for voltinism at this stage. Brehm et al. (2019)  
360 reported a positive Bergmann's pattern in the ectothermic *Geometridae* and *Arctiinae* moths in  
361 Costa Rica, and ruled out thermoregulation as the primary mechanism. It has been suggested that  
362 hawkmoths should be considered as (behavioural) endotherms – for the purpose of Bergmann's  
363 pattern – because of their active 'shivering' of thoracic muscles to heat up the body (Heinrich 1993;  
364 Beerli et al. 2019) which explains the positive body size-elevation relationship at the community  
365 level in our study. However, it may be noted that the only other community-approach to  
366 Bergmann's patterns in moths, which incorporates both – intraspecific variation and species relative  
367 abundances – and was conducted along a tropical elevational gradient for a direct comparison, also  
368 revealed a strong positive Bergmann's patterns along the elevational gradient in strictly ectothermic  
369 groups i.e. *Geometridae* and *Arctiinae* (Brehm et al. 2019). This raises an important question of  
370 whether this similarity is methodological, or mechanistic.

371 Overall, interspecific variation of species turnover accounted for an average 54%, where as  
372 intraspecific variation accounted for 33% of the total community-level body mass variance in  
373 hawkmoths as shown through variance partitioning. This result is consistent with a growing body of

374 literature advocating the use of both individual and species-specific traits to investigate community  
375 level trait-environment relationships (Jung et al. 2014, Siefert et al. 2015, Enquist et al. 2015;  
376 Classen et al. 2017). Only few studies have explored the extent of intraspecific variability in insect  
377 communities till date, and obtained very contrasting values (e.g. < 5% for dung beetles (*Insecta:*  
378 *Coleoptera*) by Griffiths et al. 2016; < 1% for stonefly assemblages (*Insecta: Plecoptera*) by  
379 Garcia-Raventós et al. 2017; and > 70% for spider communities (Arachnida: Araneae) by Dahirel et  
380 al. 2017). Interestingly, our results are very similar to the values reported for several plant  
381 communities (reviewed in Auger & Shipley 2013 and global meta-analysis in Siefert et al. 2015).  
382 Other taxa have reported mixed results (33% for tadpoles by Xavier Jordani et al. 2019; 70% in  
383 lichens by Asplund & Wardle 2014). It is suggested that community-level trait variation, especially  
384 across broad environmental gradients, is driven primarily by species turnover, but the relative  
385 importance of intraspecific variation depends strongly on the trait, environmental factor, and spatial  
386 scale considered (Araújo & Costa-Pereira 2013; Siefert et al. 2014). In the context of Bergmann's  
387 pattern, our results suggest that intraspecific variation should be an important consideration for  
388 groups with low beta diversity (i.e. large ranges of species within the study site), and at shorter  
389 spatial scales (e.g. local elevational transects). However, more studies will be needed to affirm the  
390 generality of this observation.

### 391 **Converse-Bergmann's Patterns in Birds**

392 We found a converse Bergmann's pattern in birds at both community and interspecific scales. This  
393 is entirely against the expectation from the classical thermoregulatory mechanism in endothermic  
394 organisms, but matches with the previous (interspecific) pattern observed in the region (Schumm et  
395 al. 2020). Schumm et al. (2020) reported a decreasing trend for forest species and positive  
396 relationship for open habitat species and an initial decrease followed by increase above 3500 m  
397 elevation for the entire community. We note that this transition in pattern occurred above our

398 sampling limit. Freeman (2017) found no significant relationship between species body mass and  
399 elevational range mid-point for passerines in New Guinea, Peru and Costa Rica and suggested that  
400 thermoregulation may not be the primary determinant for avian body mass along tropical  
401 elevational transects.

402 Birds are among the most studied of animal groups and ecologists have a better understanding of  
403 the various life-history traits that characterise this speciose group. Not surprisingly, Bergmann's  
404 pattern has been explored along multiple life-history dimensions to understand their impact on the  
405 basic thermoregulatory paradigm. We have already discussed the issue of beta diversity impacting  
406 Bergmann's pattern. While thermoregulation may cause body size to increase with decreasing  
407 temperature, resource (food) availability may result in a positive correlation due to reduced primary  
408 productivity at low temperatures. In this context, it has been reported that the decrease of avian  
409 body size with elevation in the eastern Himalayas is correlated with decreasing arthropod (their  
410 prey) body size (Price et al. 2014; Schumm et al. 2020). But, results from Brehm et al. (2019) and  
411 this work show that all insect groups do not show such a decrease, especially when local  
412 abundances are incorporated.

413 The expected Bergmann's pattern has been seen more regularly in birds across latitudinal gradients,  
414 but even here the results suggest the modifying influence of life-history traits: weaker pattern for  
415 species which are migratory and/or have sheltered nesting in the western Palearctic (Mainwaring &  
416 Street 2019); contrasting pattern for endemics and non-endemics in the Andes, both along  
417 latitudinal and elevational gradients; successful establishment of alien species is less dependent on  
418 thermoregulatory considerations than the location of introduction (Blackburn et al. 2019). On the  
419 other hand, Olson et al. (2009) concluded from a global analysis of over 9000 species that the  
420 positive Bergmann's pattern was driven by a combination of temperature and resource availability.

421 Analysing a large data set of North American birds, Goodman et al. (2012) found that body size was  
422 more impacted by climatic variability and primary productivity than mean ambient temperature. We  
423 re-emphasize that taxonomic and spatial scales are important considerations for comparing  
424 mechanistic processes, however we did not find any previous study that has assessed body size  
425 variation in birds along elevational transects using abundance-weighted community mean, for a  
426 direct comparison.

## 427 **Conclusion**

428 Despite a large body of literature on characterizing Bergmann's patterns, no study has yet  
429 empirically demonstrated geographic gradients in body size at the population, species and  
430 community level using the same data. Our cross-taxon and cross-scale comparison using  
431 hawkmoths and birds along the same 2600 m elevational gradient revealed discrepant patterns for  
432 the two taxa, and at different taxonomic scales. We suggest that drawing taxon-specific  
433 generalization of processes, on the basis of results from across taxonomic scales is premature. We  
434 further highlight the importance of species abundances and intraspecific variation for characterizing  
435 geographic gradients in body size at the level of communities, and suggest that the validity of the  
436 current approach of using assemblage-means based on species occurrences and mean body sizes  
437 needs to be empirically verified, especially along elevational gradients that may span the entire  
438 geographic ranges of several species within a taxa. Methodologically, we argue for a community-  
439 oriented approach in future studies for addressing the generality of Bergmann's pattern because of  
440 its potential in resolving the relative importance of individual and species-level processes. Our  
441 study, though not conducted to explicitly test any particular mechanism, provides strong support  
442 against the classical thermoregulatory mechanism in endotherms, and warrants further  
443 investigations into the likely mechanism (including heat conservation) governing body size patterns  
444 for ectotherms. More in-depth analysis across different taxonomic scales, especially in a



445 comparative frame-work across different taxa along the same transect are required for an accurate  
446 charachterization of the Bergmann's pattern. We conclude by reiterating the key lesson from this  
447 study: that every study should consider, and address, the taxonomic- and spatial-scale dependency  
448 of Bergmann's patterns, and species relative abundance and intraspecific trait variation may be  
449 essential ingredients for doing so.

## 450 **References**

- 451 1. Adams, D.C. and Church, J.O., 2008. Amphibians do not follow Bergmann's rule.  
452 *Evolution: International Journal of Organic Evolution*, 62(2), pp.413-420.
- 453 2. Alhajeri, B.H. and Steppan, S.J., 2016. Association between climate and body size in  
454 rodents: a phylogenetic test of Bergmann's rule. *Mammalian Biology*, 81(2), pp.219-225.
- 455 3. Ali, S., and S. D. Ripley. 1972. Handbook of the birds of India and Pakistan, together with  
456 those of Bangladesh, Nepal, Bhutan, and Sri Lanka. Oxford University Press, Bombay.
- 457 4. Araújo, M.S. and Costa-Pereira, R., 2013. Latitudinal gradients in intraspecific ecological  
458 diversity. *Biology letters*, 9(6), p.20130778.
- 459 5. Ashton, K.G., 2002. Patterns of within-species body size variation of birds: strong evidence  
460 for Bergmann's rule. *Global Ecology and Biogeography*, 11(6), pp.505-523.
- 461 6. Asplund, J. and Wardle, D.A., 2014. Within species variability is the main driver of  
462 community level responses of traits of epiphytes across a long term chronosequence.  
463 *Functional Ecology*, 28(6), pp.1513-1522.
- 464 7. Atkinson, D. and Sibly, R.M., 1997. Why are organisms usually bigger in colder  
465 environments? Making sense of a life history puzzle. *Trends in ecology & evolution*, 12(6),  
466 pp.235-239.
- 467 8. Auger, S. and Shipley, B., 2013. Inter specific and intra specific trait variation along short  
468 environmental gradients in an old growth temperate forest. *Journal of Vegetation Science*,  
469 24(3), pp.419-428.
- 470 9. Bartholemew, G.A., Vleck, D. and Vleck, C.M., 1981. Instantaneous measurements of  
471 oxygen consumption during pre-flight warm-up and post-flight cooling in sphingid and  
472 saturnid moths. *Journal of Experimental Biology*, 90, pp.17-32.

- 473 10. Beck, J. and Kitching, I.J., 2009. Drivers of moth species richness on tropical altitudinal  
474 gradients: a cross-regional comparison. *Global Ecology and Biogeography*, 18(3), pp.361-  
475 371.
- 476 11. Beck, J., Kitching, I.J. and Linsenmair, K.E., 2006a. Wallace's line revisited: has vicariance  
477 or dispersal shaped the distribution of Malesian hawkmoths (Lepidoptera: Sphingidae)?.  
478 *Biological Journal of the Linnean Society*, 89(3), pp.455-468.
- 479 12. Beck, J., Kitching, I.J. and Linsenmair, K.E., 2006b. Effects of habitat disturbance can be  
480 subtle yet significant: biodiversity of hawkmoth-assemblages (Lepidoptera: Sphingidae) in  
481 Southeast-Asia. In *Arthropod Diversity and Conservation* (pp. 451-472). Springer,  
482 Dordrecht.
- 483 13. Beck, J., Liedtke, H.C., Widler, S., Altermatt, F., Loader, S.P., Hagmann, R., Lang, S. and  
484 Fiedler, K., 2016. Patterns or mechanisms? Bergmann's and Rapoport's rule in moths along  
485 an elevational gradient. *Community Ecology*, 17(2), pp.137-148.
- 486 14. Beerli, N., Bärtschi, F., Ballesteros-Mejia, L., Kitching, I.J. and Beck, J., 2019. How has the  
487 environment shaped geographical patterns of insect body sizes? A test of hypotheses using  
488 sphingid moths. *Journal of Biogeography*, 46(8), pp.1687-1698.
- 489 15. Bidau, C.J. and Martí, D.A., 2007. Clinal variation of body size in *Dichroplus pratensis*  
490 (Orthoptera: Acrididae): inversion of Bergmann's and Rensch's rules. *Annals of the*  
491 *Entomological Society of America*, 100(6), pp.850-860.
- 492 16. Bivand, Roger S. and Wong, David W. S. (2018) Comparing implementations of global and  
493 local indicators of spatial association TEST, 27(3), 716-748. URL  
494 <https://doi.org/10.1007/s11749-018-0599-x>
- 495 17. Blackburn, T.M. and Gaston, K.J., 1996. Spatial patterns in the body sizes of bird species in  
496 the New World. *Oikos*, pp.436-446.

- 497 18. Blackburn, T.M. and Hawkins, B.A., 2004. Bergmann's rule and the mammal fauna of  
498 northern North America. *Ecography*, 27(6), pp.715-724.
- 499 19. Blackburn, T.M., Redding, D.W. and Dyer, E.E., 2019. Bergmann's rule in alien birds.  
500 *Ecography*, 42(1), pp.102-110.
- 501 20. Brehm, G. and Fiedler, K., 2004. Bergmann's rule does not apply to geometrid moths along  
502 an elevational gradient in an Andean montane rain forest. *Global Ecology and*  
503 *Biogeography*, 13(1), pp.7-14.
- 504 21. Brehm, G., Zeuss, D. and Colwell, R.K., 2019. Moth body size increases with elevation  
505 along a complete tropical elevational gradient for two hyperdiverse clades. *Ecography*,  
506 42(4), pp.632-642.
- 507 22. Chase, J.M. and Knight, T.M., 2013. Scale dependent effect sizes of ecological drivers on  
508 biodiversity: why standardised sampling is not enough. *Ecology letters*, 16, pp.17-26.
- 509 23. Chase, J.M., McGill, B.J., McGlinn, D.J., May, F., Blowes, S.A., Xiao, X., Knight, T.M.,  
510 Purschke, O. and Gotelli, N.J., 2018. Embracing scale dependence to achieve a deeper  
511 understanding of biodiversity and its change across communities. *Ecology letters*, 21(11),  
512 pp.1737-1751.
- 513 24. Chown, S.L. and Gaston, K.J., 2010. Body size variation in insects: a macroecological  
514 perspective. *Biological Reviews*, 85(1), pp.139-169.
- 515 25. Classen, A., Steffan-Dewenter, I., Kindeketa, W.J. and Peters, M.K., 2017. Integrating  
516 intraspecific variation in community ecology unifies theories on body size shifts along  
517 climatic gradients. *Functional Ecology*, 31(3), pp.768-777.
- 518 26. Cornwell, W.K. and Ackerly, D.D., 2009. Community assembly and shifts in plant trait  
519 distributions across an environmental gradient in coastal California. *Ecological*  
520 *Monographs*, 79(1), pp.109-126.

- 521 27. Cushman, J.H., Lawton, J.H. and Manly, B.F., 1993. Latitudinal patterns in European ant  
522 assemblages: variation in species richness and body size. *Oecologia*, 95(1), pp.30-37
- 523 28. Dahirrel, M., Dierick, J., De Cock, M. and Bonte, D., 2017. Intraspecific variation shapes  
524 community level behavioral responses to urbanization in spiders. *Ecology*, 98(9), pp.2379-  
525 2390.
- 526 29. de la Riva, E.G., Pérez Ramos, I.M., Tosto, A., Navarro Fernández, C.M., Olmo, M.,  
527 Marañón, T. and Villar, R., 2016. Disentangling the relative importance of species  
528 occurrence, abundance and intraspecific variability in community assembly: a trait based  
529 approach at the whole plant level in Mediterranean forests. *Oikos*, 125(3), pp.354-363.
- 530 30. Des Roches, S., Post, D.M., Turley, N.E., Bailey, J.K., Hendry, A.P., Kinnison, M.T.,  
531 Schweitzer, J.A. and Palkovacs, E.P., 2018. The ecological importance of intraspecific  
532 variation. *Nature ecology & evolution*, 2(1), pp.57-64.
- 533 31. Dillon, M.E., Frazier, M.R. and Dudley, R., 2006. Into thin air: physiology and evolution of  
534 alpine insects. *Integrative and Comparative Biology*, 46(1), pp.49-61.
- 535 32. Diniz-Filho, J.A.F., Bini, L.M. and Hawkins, B.A., 2003. Spatial autocorrelation and red  
536 herrings in geographical ecology. *Global ecology and Biogeography*, 12(1), pp.53-64.
- 537 33. Enquist, B.J., Norberg, J., Bonser, S.P., Violle, C., Webb, C.T., Henderson, A., Sloat, L.L.  
538 and Savage, V.M., 2015. Scaling from traits to ecosystems: developing a general trait driver  
539 theory via integrating trait-based and metabolic scaling theories. *Advances in ecological  
540 research*, 52, pp.249-318.
- 541 34. Fan, L., Cai, T., Xiong, Y., Song, G. and Lei, F., 2019. Bergmann's rule and Allen's rule in  
542 two passerine birds in China. *Avian Research*, 10(1), pp.1-11.
- 543 35. Freeman, B.G., 2017. Little evidence for Bergmann's rule body size clines in passerines  
544 along tropical elevational gradients. *Journal of Biogeography*, 44(3), pp.502-510.

- 545 36. Garcia Raventós, A., Viza, A., Tierno de Figueroa, J.M., Riera, J.L. and Múrria, C., 2017.  
546 Seasonality, species richness and poor dispersion mediate intraspecific trait variability in  
547 stonefly community responses along an elevational gradient. *Freshwater Biology*, 62(5),  
548 pp.916-928.
- 549 37. Gaston, K.J., Chown, S.L. and Evans, K.L., 2008. Ecogeographical rules: elements of a  
550 synthesis. *Journal of Biogeography*, 35(3), pp.483-500.
- 551 38. Gillooly, J.F., Allen, A.P., West, G.B. and Brown, J.H., 2005. The rate of DNA evolution:  
552 effects of body size and temperature on the molecular clock. *Proceedings of the National  
553 Academy of Sciences*, 102(1), pp.140-145.
- 554 39. Gohli, J. and Voje, K.L., 2016. An interspecific assessment of Bergmann's rule in 22  
555 mammalian families. *BMC Evolutionary Biology*, 16(1), pp.1-12.
- 556 40. Goldberg, J., Cardozo, D., Brusquetti, F., Bueno Villafaña, D., Caballero Gini, A. and  
557 Bianchi, C., 2018. Body size variation and sexual size dimorphism across climatic gradients  
558 in the widespread treefrog *Scinax fuscovarius* (Anura, Hylidae). *Austral Ecology*, 43(1),  
559 pp.35-45.
- 560 41. Goodman, R.E., Lebuhn, G., Seavy, N.E., Gardali, T. and Bluso-Demers, J.D., 2012. Avian  
561 body size changes and climate change: warming or increasing variability?. *Global Change  
562 Biology*, 18(1), pp.63-73.
- 563 42. Griffiths, H.M., Louzada, J., Bardgett, R.D. and Barlow, J., 2016. Assessing the importance  
564 of intraspecific variability in dung beetle functional traits. *PloS one*, 11(3), p.e0145598.
- 565 43. Gutiérrez-Pinto, N., McCracken, K.G., Alza, L., Tubaro, P., Kopuchian, C., Astie, A. and  
566 Cadena, C.D., 2014. The validity of ecogeographical rules is context-dependent: testing for  
567 Bergmann's and Allen's rules by latitude and elevation in a widespread Andean duck.  
568 *Biological Journal of the Linnean Society*, 111(4), pp.850-862.

- 569 44. Hassall, C., 2015. Odonata as candidate macroecological barometers for global climate  
570 change. *Freshwater Science*, 34(3), pp.1040-1049.
- 571 45. Heinrich, B., 1993: The Hot-Blooded Insects. Strategies and Mechanisms of  
572 Thermoregulation. Berlin and Heidelberg: Springer-Verlag. 601 pp.
- 573 46. Oksanen J., Blanchet G. F., Friendly M., Kindt R., Legendre P., McGlinn D., Minchin P. R.,  
574 R. B. O'Hara, Simpson G. L., Solymos P., M. Henry H. Stevens, Szoecs E. and Wagner H.  
575 (2019). *vegan: Community Ecology Package*. R package version 2.5-6. [https://CRAN.R-](https://CRAN.R-project.org/package=vegan)  
576 [project.org/package=vegan](https://CRAN.R-project.org/package=vegan)
- 577 47. Jetz, W., Thomas, G.H., Joy, J.B., Hartmann, K. and Mooers, A.O., 2012. The global  
578 diversity of birds in space and time. *Nature*, 491(7424), pp.444-448.
- 579 48. Jung, V., Albert, C.H., Violle, C., Kunstler, G., Loucougaray, G. and Spiegelberger, T., 2014.  
580 Intraspecific trait variability mediates the response of subalpine grassland communities to  
581 extreme drought events. *Journal of ecology*, 102(1), pp.45-53.
- 582 49. Keddy, P.A., 1992. Assembly and response rules: two goals for predictive community  
583 ecology. *Journal of vegetation science*, 3(2), pp.157-164.
- 584 50. Kichenin, E., Wardle, D.A., Peltzer, D.A., Morse, C.W. and Freschet, G.T., 2013.  
585 Contrasting effects of plant inter-and intraspecific variation on community-level trait  
586 measures along an environmental gradient. *Functional Ecology*, 27(5), pp.1254-1261.
- 587 51. Kitching, I.J. 2020. Sphingidae Taxonomic Inventory, <http://sphingidae.myspecies.info/>,  
588 accessed on 15 November 2019
- 589 52. Klepsatel, P., Gáliková, M., Huber, C.D. and Flatt, T., 2014. Similarities and differences in  
590 altitudinal versus latitudinal variation for morphological traits in *Drosophila melanogaster*.  
591 *Evolution*, 68(5), pp.1385-1398.
- 592 53. Körner, C. 2000. Why are there global gradients in species richness? Mountains might hold  
593 the answer. *Trends Ecol. Evol.* 15: 513-514.

- 594 54. Kuhn M., 2020. caret: Classification and Regression Training. R package version 6.0-86.  
595 <https://CRAN.R-project.org/package=caret>
- 596 55. Kuznetsova A, Brockhoff PB, Christensen RHB (2017). “lmerTest Package: Tests in Linear  
597 Mixed Effects Models.” *Journal of Statistical Software*, \*82\*(13), 1-26. doi:  
598 10.18637/jss.v082.i13 (URL: <https://doi.org/10.18637/jss.v082.i13>).
- 599 56. Lepš, J., de Bello, F., Šmilauer, P. and Doležal, J., 2011. Community trait response to  
600 environment: disentangling species turnover vs intraspecific trait variability effects.  
601 *Ecography*, 34(5), pp.856-863.
- 602 57. Levin, S.A., 1992. The problem of pattern and scale in ecology: the Robert H. MacArthur  
603 award lecture. *Ecology*, 73(6), pp.1943-1967.
- 604 58. MacArthur, R. and Levins, R., 1967. The limiting similarity, convergence, and divergence of  
605 coexisting species. *The american naturalist*, 101(921), pp.377-385.
- 606 59. Mainwaring, M.C. and Street, S.E., 2019. Conformity to Bergmann’s rule in birds depends  
607 on nest design and migration. *bioRxiv*, p.686972.
- 608 60. Mani, M.S., 1968. Ecological specializations of high altitude insects. In *Ecology and*  
609 *biogeography of high altitude insects* (pp. 51-74). Springer, Dordrecht.
- 610 61. McNab, B.K., 2010. Geographic and temporal correlations of mammalian size reconsidered:  
611 a resource rule. *Oecologia*, 164(1), pp.13-23.
- 612 62. Meiri, S. and Dayan, T., 2003. On the validity of Bergmann's rule. *Journal of biogeography*,  
613 30(3), pp.331-351.
- 614 63. Meiri, S. and Thomas, G.H., 2007. The geography of body size—challenges of the  
615 interspecific approach. *Global Ecology and Biogeography*, 16(6), pp.689-693.
- 616 64. Mousseau, T.A., 1997. Ectotherms follow the converse to Bergmann's rule. *Evolution*,  
617 pp.630-632.



- 618 65. Mungee, M. and Athreya, R., 2020a. Rapid photogrammetry of morphological traits of free-  
619 ranging moths. *Ecological Entomology*, 45(5), pp.911-923.
- 620 66. Mungee, M. and Athreya, R., 2020b. Intraspecific trait variability and community assembly  
621 in hawkmoths (Lepidoptera: Sphingidae) across an elevational gradient in the eastern  
622 Himalayas, India. *Ecology & Evolution*; 10.1002/ece3.7054
- 623 67. Myers, N., Mittermeier, R.A., Mittermeier, C.G., Da Fonseca, G.A. and Kent, J., 2000.  
624 Biodiversity hotspots for conservation priorities. *Nature*, 403(6772), pp.853-858.
- 625 68. Nwaogu, C.J., Tieleman, B.I., Bitrus, K. and Cresswell, W., 2018. Temperature and aridity  
626 determine body size conformity to Bergmann's rule independent of latitudinal differences in  
627 a tropical environment. *Journal of ornithology*, 159(4), pp.1053-1062.
- 628 69. Olalla-Tárraga, M.Á. and Rodríguez, M.Á., 2007. Energy and interspecific body size  
629 patterns of amphibian faunas in Europe and North America: anurans follow Bergmann's  
630 rule, urodeles its converse. *Global Ecology and Biogeography*, 16(5), pp.606-617.
- 631 70. Olalla-Tárraga, M.Á., 2011. "Nullius in Bergmann" or the pluralistic approach to  
632 ecogeographical rules: a reply to Watt et al.(2010). *Oikos*, 120(10), pp.1441-1444.
- 633 71. Olalla-Tárraga, M.A., Bini, L.M., Diniz-Filho, J.A. and Rodríguez, M.Á., 2010. Cross-  
634 species and assemblage-based approaches to Bergmann's rule and the biogeography of body  
635 size in Plethodon salamanders of eastern North America. *Ecography*, 33(2), pp.362-368.
- 636 72. Olalla-Tárraga, M.Á., Diniz-Filho, J.A.F., Bastos, R.P. and Rodríguez, M.Á., 2009.  
637 Geographic body size gradients in tropical regions: water deficit and anuran body size in the  
638 Brazilian Cerrado. *Ecography*, 32(4), pp.581-590
- 639 73. Olalla-Tárraga, M.Á., Rodríguez, M.Á. and Hawkins, B.A., 2006. Broad-scale patterns of  
640 body size in squamate reptiles of Europe and North America. *Journal of Biogeography*,  
641 33(5), pp.781-793.

- 642 74. Olson, V.A., Davies, R.G., Orme, C.D.L., Thomas, G.H., Meiri, S., Blackburn, T.M.,  
643 Gaston, K.J., Owens, I.P. and Bennett, P.M., 2009. Global biogeography and ecology of  
644 body size in birds. *Ecology Letters*, 12(3), pp.249-259.
- 645 75. Orme, C.D.L., Davies, R.G., Burgess, M., Eigenbrod, F., Pickup, N., Olson, V.A., Webster,  
646 A.J., Ding, T.S., Rasmussen, P.C., Ridgely, R.S. and Stattersfield, A.J., 2005. Global  
647 hotspots of species richness are not congruent with endemism or threat. *Nature*, 436(7053),  
648 pp.1016-1019.
- 649 76. Pagel M. Inferring the historical patterns of biological evolution. *Nature*. 1999;401:877–84.
- 650 77. Paradis E. & Schliep K. 2018., ape 5.0: an environment for modern phylogenetics and  
651 evolutionary analyses in R. *Bioinformatics* 35: 526-528.
- 652 78. Price, T.D., 2012. Eaglenest Wildlife Sanctuary: Pressures on Biodiversity: (EO Wilson  
653 Award Address).
- 654 79. Price, T.D., Hooper, D.M., Buchanan, C.D., Johansson, U.S., Tietze, D.T., Alström, P.,  
655 Olsson, U., Ghosh-Harihar, M., Ishtiaq, F., Gupta, S.K. and Martens, J., 2014. Niche filling  
656 slows the diversification of Himalayan songbirds. *Nature*, 509(7499), pp.222-225.
- 657 80. Quintero, I. and Jetz, W., 2018. Global elevational diversity and diversification of birds.  
658 *Nature*, 555(7695), pp.246-250.
- 659 81. Rahbek, C., 1997. The relationship among area, elevation, and regional species richness in  
660 neotropical birds. *The American Naturalist*, 149(5), pp.875-902.
- 661 82. Rasmussen, P. C., and J. C. Anderton. 2005. Birds of south Asia: The Ripley guide, Vol. 2.  
662 Lynx edicions, Barcelona, Spain.
- 663 83. Riemer, K., Guralnick, R.P. and White, E.P., 2018. No general relationship between mass  
664 and temperature in endothermic species. *Elife*, 7, p.e27166.

- 665 84. Rodríguez, M.Á., Olalla-Tárraga, M.Á. and Hawkins, B.A., 2008. Bergmann's rule and the  
666 geography of mammal body size in the Western Hemisphere. *Global Ecology and*  
667 *Biogeography*, 17(2), pp.274-283.
- 668 85. Rosenzweig, M.L., 1968. Net primary productivity of terrestrial communities: prediction  
669 from climatological data. *The American Naturalist*, 102(923), pp.67-74.
- 670 86. Salewski, V. and Watt, C., 2017. Bergmann's rule: a biophysiological rule examined in birds.  
671 *Oikos*, 126(2).
- 672 87. Schumm, M., White, A.E., Supriya, K. and Price, T.D., 2020. Ecological limits as the driver  
673 of bird species richness patterns along the east Himalayan elevational gradient. *The*  
674 *American Naturalist*, 195(5), pp.802-817.
- 675 88. Shelomi, M., 2012. Where are we now? Bergmann's rule sensu lato in insects. *The*  
676 *American Naturalist*, 180(4), pp.511-519.
- 677 89. Siefert, A., Violle, C., Chalmandrier, L., Albert, C.H., Taudiere, A., Fajardo, A., Aarssen,  
678 L.W., Baraloto, C., Carlucci, M.B., Cianciaruso, M.V. and de L. Dantas, V., 2015. A global  
679 meta-analysis of the relative extent of intraspecific trait variation in plant communities.  
680 *Ecology letters*, 18(12), pp.1406-1419.
- 681 90. Sun, Y., Li, M., Song, G., Lei, F., Li, D. and Wu, Y., 2017. The role of climate factors in  
682 geographic variation in body mass and wing length in a passerine bird. *Avian Research*, 8(1),  
683 pp.1-9.
- 684 91. Taudiere, A. and Violle, C., 2016. cati: an R package using functional traits to detect and  
685 quantify multi-level community assembly processes. *Ecography*, 39(7), pp.699-708.
- 686 92. Vellend, M., Lajoie, G., Bourret, A., Múrria, C., Kembel, S.W. and Garant, D., 2014.  
687 Drawing ecological inferences from coincident patterns of population-and community-level  
688 biodiversity. *Molecular Ecology*, 23(12), pp.2890-2901.

- 689 93. Watt, C., Mitchell, S. and Salewski, V., 2010. Bergmann's rule; a concept cluster?. *Oikos*,  
690 119(1), pp.89-100.
- 691 94. Wilman, H., Belmaker, J., Simpson, J., de la Rosa, C., Rivadeneira, M.M. and Jetz, W.,  
692 2014. EltonTraits 1.0: Species-level foraging attributes of the world's birds and mammals:  
693 Ecological Archives E095-178. *Ecology*, 95(7), pp.2027-2027.
- 694 95. Xavier Jordani, M., Mouquet, N., Casatti, L., Menin, M., de Cerqueira Rossa Feres, D. and  
695 Albert, C.H., 2019. Intraspecific and interspecific trait variability in tadpole meta  
696 communities from the Brazilian Atlantic rainforest. *Ecology and evolution*, 9(7), pp.4025-  
697 4037.
- 698 96. Yom-Tov, Y. and Geffen, E., 2006. Geographic variation in body size: the effects of ambient  
699 temperature and precipitation. *Oecologia*, 148(2), pp.213-218.
- 700 97. Zamora Camacho, F.J., Reguera, S. and Moreno Rueda, G., 2014. Bergmann's Rule rules  
701 body size in an ectotherm: heat conservation in a lizard along a 2200 metre elevational  
702 gradient. *Journal of Evolutionary Biology*, 27(12), pp.2820-2828.
- 703 98. Zeuss, D., Brunzel, S. and Brandl, R., 2017. Environmental drivers of voltinism and body  
704 size in insect assemblages across Europe. *Global Ecology and Biogeography*, 26(2), pp.154-  
705 165.
- 706 99. Zug, G.R., Vitt, L.J. & Caldwell, J.P. (2001) Herpetology. Academic Press, San Diego
